# Supplementary material for: MYC overrides HIF-1α to regulate proliferating primary cell metabolism in hypoxia
Source: eLife. 2023 Jul 10;12:e82597. doi: 10.7554/eLife.82597 (PMC10332812; doi:10.7554/eLife.82597)
Supplement: Figure 9—source data 1. [file elife-82597-fig9-data1.csv]

Pathway	NES
Protein digestion and absorption	1.8378528290709417
Aminoacyl-tRNA biosynthesis	1.8140105454078943
Arginine and proline metabolism	1.790668235943086
beta-Alanine metabolism	1.6707980007989447
Biosynthesis of unsaturated fatty acids	1.6363437438491468
Fatty acid biosynthesis	1.6363437438491468
ABC transporters	1.5772505417314162
Morphine addiction	1.4563898072284545
Primary bile acid biosynthesis	1.4126542660057118
Pathways in cancer	-1.5166400684298256
Renal cell carcinoma	-1.5166400684298256
Amino sugar and nucleotide sugar metabolism	-1.599431057538704
Glyoxylate and dicarboxylate metabolism	-1.6351988550480376
Glucagon signaling pathway	-1.732543658270028
Citrate cycle (TCA cycle)	-1.9293668740334717
