# Supplementary material for: MYC overrides HIF-1α to regulate proliferating primary cell metabolism in hypoxia
Source: eLife. 2023 Jul 10;12:e82597. doi: 10.7554/eLife.82597 (PMC10332812; doi:10.7554/eLife.82597)
Supplement: Figure 10—source data 1. [file elife-82597-fig10-data1.csv]

Pathway	NES
E2F TARGETS	3.2515964299863267
G2M CHECKPOINT	2.822912815232154
MYC TARGETS V1	2.5952683502112355
SPERMATOGENESIS	1.8389775448345094
DNA REPAIR	1.7829208974622173
MYC TARGETS V2	1.5634540549081624
MITOTIC SPINDLE	1.561295202990584
OXIDATIVE PHOSPHORYLATION	1.298704749925135
PROTEIN SECRETION	-1.3843772697826842
PEROXISOME	-1.4431157455943568
ALLOGRAFT REJECTION	-1.5848368845484868
UNFOLDED PROTEIN RESPONSE	-1.6196744372575103
COMPLEMENT	-1.6229867892437315
ESTROGEN RESPONSE EARLY	-1.6789737742718227
BILE ACID METABOLISM	-1.7105132157066296
XENOBIOTIC METABOLISM	-1.727634174716851
CHOLESTEROL HOMEOSTASIS	-1.7379995979370362
PANCREAS BETA CELLS	-1.757766212472767
APOPTOSIS	-1.7592344998584626
INTERFERON GAMMA RESPONSE	-1.7926843856403183
IL2 STAT5 SIGNALING	-1.8205915185442914
TNFA SIGNALING VIA NFKB	-1.8365654369549818
APICAL SURFACE	-1.876867735706422
P53 PATHWAY	-1.8783558700341036
UV RESPONSE DN	-1.8983533489073867
INFLAMMATORY RESPONSE	-1.9113381118040302
COAGULATION	-1.9245031811952154
MYOGENESIS	-1.9728143488240462
INTERFERON ALPHA RESPONSE	-1.9867634779642753
ANGIOGENESIS	-2.069038033569932
IL6 JAK STAT3 SIGNALING	-2.1010546250108493
APICAL JUNCTION	-2.150820539252641
EPITHELIAL MESENCHYMAL TRANSITION	-2.6054256375913325
